# Supplementary material for: Naringin Attenuates High Fat Diet Induced Non-alcoholic Fatty Liver Disease and Gut Bacterial Dysbiosis in Mice
Source: Frontiers journal article supplement (doi:10.3389/fmicb.2020.585066), 2020-11-13
Supplement: Image_1.pdf [file Image_1.pdf]

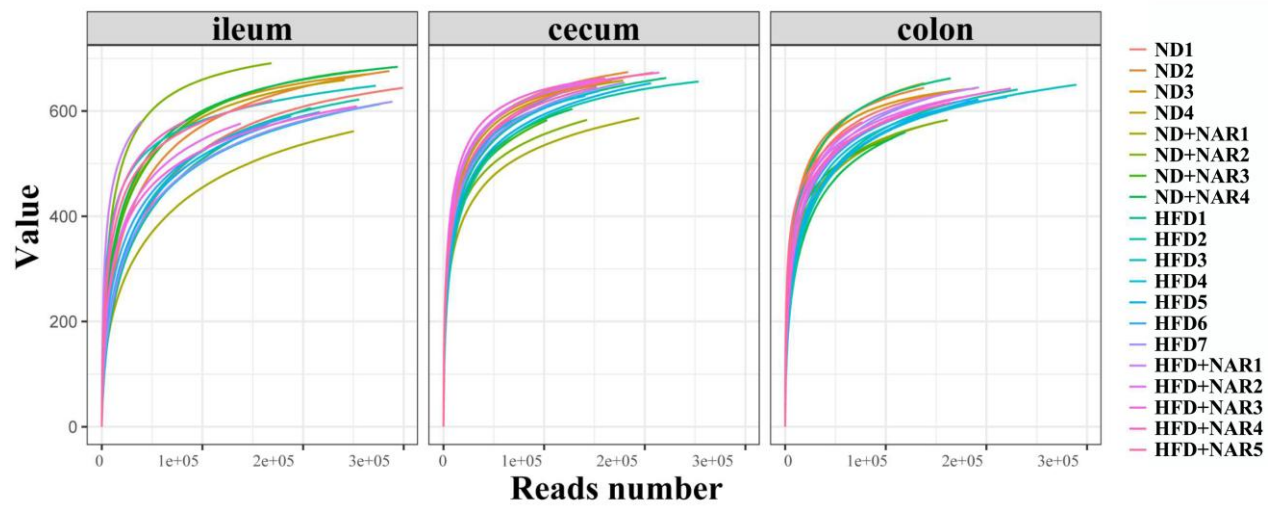

**Supplementary Fig. 1.** The rarefaction curve of all samples from ileum, cecum, colon.
