# Supplementary material for: Naringin Attenuates High Fat Diet Induced Non-alcoholic Fatty Liver Disease and Gut Bacterial Dysbiosis in Mice
Source: Front Microbiol. 2020 Nov 13;11:585066. doi: 10.3389/fmicb.2020.585066 (PMC7691324; doi:10.3389/fmicb.2020.585066)
Supplement: Supplementary file 3 [file Table_1.XLS]

## Sheet: genus_WDWARco_WDco.diffAb
genus	Mean(HFDNARco)	Variance(HFDNARco)	Std.err(HFDNARco)	Mean(HFDco)	Variance(HFDco)	Std.err(HFDco)	P value	Q value
Campylobacter	2.61e-06	3.41e-11	2.61e-06	0.00127	1.23e-07	0.000133	0	0
Clostridium_sensu_stricto_13	1.28e-05	6.48e-11	3.6e-06	0.000241	7.11e-09	3.19e-05	0	0
Rhodoplanes	0.000275	4.45e-09	2.98e-05	1.18e-05	1.34e-10	4.37e-06	0	0
uncultured_bacterium_f_Xanthobacteraceae	0.0014	9.92e-08	0.000141	0.000104	4.88e-10	8.35e-06	0	0
uncultured_bacterium_f_p-251-o5	1.04e-06	5.38e-12	1.04e-06	0.000382	1.19e-08	4.13e-05	0	0
Bradyrhizobium	0.0021	5.6e-07	0.000335	0.000112	7.31e-10	1.02e-05	2.3e-05	0.000628
Edaphobacter	4.5e-05	2.04e-10	6.39e-06	3.84e-06	4.47e-11	2.53e-06	2.3e-05	0.000628
uncultured_bacterium_f_Acetobacteraceae	0.000773	7.29e-08	0.000121	7.48e-05	1.4e-09	1.42e-05	2.3e-05	0.000628
Allorhizobium-Neorhizobium-Pararhizobium-Rhizobium	0.0003	4.43e-09	2.98e-05	0.00012	2.14e-09	1.75e-05	6.45e-05	0.00156
Acidibacter	0.000485	4.74e-08	9.73e-05	7.42e-06	7.63e-11	3.3e-06	0.000203	0.00442
Acidipila	0.000321	5.22e-09	3.23e-05	0.000113	6.11e-09	2.96e-05	0.00023	0.00457
Jatrophihabitans	0.000464	2.1e-08	6.48e-05	0.000144	4.35e-09	2.49e-05	0.000272	0.00488
Burkholderia-Caballeronia-Paraburkholderia	0.000373	2.3e-08	6.79e-05	6.35e-05	8.87e-10	1.13e-05	0.000304	0.00488
uncultured_bacterium_f_Micropepsaceae	0.000836	1.44e-07	0.00017	7.76e-05	9.75e-10	1.18e-05	0.000313	0.00488
Ellin6067	0.000166	6.12e-09	3.5e-05	1.47e-05	1.32e-11	1.37e-06	0.000373	0.00542
Haliangium	0.00013	3.48e-09	2.64e-05	1.77e-05	5.15e-11	2.71e-06	0.000447	0.00609
Occallatibacter	0.000433	4.46e-08	9.44e-05	5.42e-05	7.27e-10	1.02e-05	0.000797	0.0102
Granulicella	0.000273	2.22e-08	6.66e-05	1.22e-05	5.16e-11	2.72e-06	0.000917	0.0105
Microbacterium	0.000161	1.56e-09	1.77e-05	8.52e-05	4.25e-10	7.79e-06	0.000917	0.0105
Roseiarcus	0.000397	4.99e-08	9.99e-05	9.59e-06	1.03e-10	3.83e-06	0.000982	0.0107
uncultured_bacterium_f_Caulobacteraceae	0.000358	4.02e-08	8.97e-05	1.54e-05	1.46e-10	4.57e-06	0.00112	0.0113
Bryobacter	0.000433	4.05e-08	9e-05	8.15e-05	2.82e-09	2.01e-05	0.00114	0.0113
Conexibacter	0.000214	1.29e-08	5.08e-05	2.4e-05	2.82e-10	6.35e-06	0.0014	0.0131
Mesorhizobium	8.24e-05	3.42e-10	8.27e-06	4.61e-05	2e-10	5.35e-06	0.00144	0.0131
Lachnospira	1.53e-05	8.86e-11	4.21e-06	4.53e-05	3.76e-10	7.33e-06	0.00181	0.0151
uncultured_bacterium_f_67-14	0.000193	1.37e-08	5.24e-05	8.58e-06	2.51e-11	1.89e-06	0.00189	0.0151
Phenylobacterium	0.000208	1.52e-08	5.52e-05	1.4e-05	9.86e-11	3.75e-06	0.00191	0.0151
Marvinbryantia	6.4e-05	2.27e-09	2.13e-05	0.000219	1.05e-08	3.88e-05	0.00194	0.0151
Candidatus_Solibacter	0.00128	6.92e-07	0.000372	9.61e-05	1.24e-09	1.33e-05	0.00341	0.0256
Butyricicoccus	0.000728	1.52e-07	0.000174	0.000174	9.74e-09	3.73e-05	0.00394	0.0286
Faecalibaculum	0.082	0.0113	0.0475	0.225	0.00196	0.0167	0.00659	0.0463
Dubosiella	0.0129	0.000327	0.00808	0.0542	0.00114	0.0128	0.00839	0.0571
uncultured_bacterium_o_IMCC26256	0.000102	1.88e-09	1.94e-05	4.27e-05	1.09e-09	1.25e-05	0.0118	0.0778
uncultured_bacterium_f_Peptococcaceae	0.00435	1.09e-05	0.00148	0.00067	1.82e-07	0.000161	0.0134	0.0851
Massilia	0.00035	7.66e-08	0.000124	4.43e-05	4.84e-10	8.31e-06	0.0137	0.0851
Intestinimonas	0.0238	0.000365	0.00855	0.00403	3.15e-06	0.000671	0.0186	0.112
Lysinimonas	0.00012	1.99e-09	2e-05	6.98e-05	7.57e-10	1.04e-05	0.0215	0.127
uncultured_bacterium_f_Clostridiales_vadinBB60_group	0.00171	2.37e-06	0.000688	0.000193	1.75e-08	5e-05	0.023	0.127
uncultured_bacterium	0.000561	6.22e-08	0.000112	0.000293	1.75e-08	5e-05	0.0232	0.127
uncultured_bacterium_o_Gaiellales	0.000504	1.44e-07	0.000169	0.000129	3.56e-09	2.26e-05	0.0234	0.127
Ileibacterium	0.00669	4.53e-05	0.00301	0.0881	0.01	0.0379	0.026	0.138
Ruminiclostridium_9	0.0161	8.79e-05	0.00419	0.00659	2.09e-05	0.00173	0.0282	0.147
Coriobacteriaceae_UCG-002	0.0225	0.00123	0.0157	0.077	0.00354	0.0225	0.0353	0.179
uncultured_bacterium_o_Acidobacteriales	0.00212	5.21e-06	0.00102	0.000128	3.42e-09	2.21e-05	0.0387	0.192
Devosia	0.000447	1.91e-07	0.000196	7.11e-05	1.05e-09	1.23e-05	0.0418	0.203
Fusobacterium	0.000568	1.55e-06	0.000557	0.00166	1.51e-07	0.000147	0.0432	0.205
Stenotrophomonas	4.96e-05	1.48e-09	1.72e-05	1.75e-05	3.03e-11	2.08e-06	0.0483	0.224
GCA-900066575	0.0188	0.000456	0.00955	0.00146	6.92e-07	0.000314	0.0513	0.233
Agathobacter	0.000133	8.46e-08	0.00013	0.000373	1e-08	3.78e-05	0.0563	0.25
Anaerotruncus	0.00951	0.000118	0.00486	0.000968	7.09e-07	0.000318	0.0592	0.255
Globicatella	0.000159	2.61e-08	7.23e-05	2.86e-05	2.38e-09	1.84e-05	0.0601	0.255
Roseburia	0.0254	0.000264	0.00727	0.0114	8.31e-05	0.00345	0.0608	0.255
Ruminococcaceae_UCG-003	0.000733	6.28e-07	0.000354	0.000123	4.69e-09	2.59e-05	0.0642	0.264
Oscillibacter	0.0183	0.000252	0.00709	0.00579	2.12e-05	0.00174	0.0654	0.264
Harryflintia	0.00147	2.65e-06	0.000728	0.00023	3.42e-08	6.99e-05	0.0671	0.266
uncultured_bacterium_f_Ruminococcaceae	0.0716	0.00558	0.0334	0.0151	9.13e-05	0.00361	0.0699	0.272
Candidatus_Koribacter	0.000229	7.96e-08	0.000126	1.93e-05	1.14e-10	4.03e-06	0.0727	0.273
uncultured_bacterium_f_Erysipelotrichaceae	0.00391	1.41e-05	0.00168	0.0011	1.85e-07	0.000163	0.0728	0.273
Allobaculum	0.0138	0.000263	0.00725	0.00185	3.1e-07	0.00021	0.0751	0.273
Family_XIII_UCG-001	0.000127	2.27e-08	6.74e-05	1.64e-05	7.38e-11	3.25e-06	0.0751	0.273
Lachnospiraceae_NK4A136_group	0.0308	0.00102	0.0143	0.00802	2.16e-05	0.00175	0.086	0.303
Mycobacterium	0.000303	1.61e-07	0.00018	1.86e-05	5.45e-11	2.79e-06	0.0861	0.303
Lachnospiraceae_UCG-001	0.00209	5.41e-06	0.00104	0.000451	9.59e-08	0.000117	0.0886	0.303
Reyranella	0.000794	1.17e-06	0.000485	3.64e-05	1.08e-10	3.92e-06	0.0899	0.303
Acidothermus	0.000465	4.37e-07	0.000295	4.49e-06	2.3e-11	1.81e-06	0.0909	0.303
Bacteroides	0.0238	0.000788	0.0126	0.00424	5.75e-06	0.000906	0.092	0.303
Ruminiclostridium_5	0.00878	7.63e-05	0.00391	0.00267	1.92e-06	0.000524	0.093	0.303
Ruminococcaceae_UCG-013	0.000872	5.22e-07	0.000323	0.000361	4.03e-08	7.59e-05	0.095	0.303
agricultural_soil_bacterium_SC-I-84	7.23e-05	2.07e-10	6.43e-06	5.87e-05	2.68e-10	6.18e-06	0.097	0.303
Peptococcus	0.000458	2.69e-07	0.000232	9.95e-05	7.89e-09	3.36e-05	0.0972	0.303
Candidatus_Arthromitus	0.00066	7e-07	0.000374	9.17e-05	3.69e-08	7.26e-05	0.105	0.324
Akkermansia	0.00861	0.000149	0.00547	0.0836	0.0183	0.0511	0.114	0.345
Pseudogracilibacillus	3.11e-06	4.84e-11	3.11e-06	1.84e-05	7.21e-10	1.02e-05	0.118	0.352
Pseudolabrys	0.000227	7.22e-08	0.00012	5.69e-05	2.55e-10	6.03e-06	0.127	0.374
Terrabacter	0.000287	1.68e-07	0.000183	3.07e-05	1.18e-10	4.1e-06	0.131	0.381
Caenimonas	0.000259	1.35e-07	0.000165	3.11e-05	3.98e-10	7.54e-06	0.135	0.386
Facklamia	1.62e-05	3.39e-10	8.23e-06	3.97e-06	8.21e-11	3.42e-06	0.139	0.386
uncultured_bacterium_f_Lachnospiraceae	0.0583	0.00269	0.0232	0.0243	0.000545	0.00882	0.139	0.386
Bilophila	0.0139	0.000281	0.0075	0.00338	2.33e-05	0.00182	0.141	0.386
Lachnospiraceae_FCS020_group	0.00185	2.71e-06	0.000736	0.000821	2.14e-07	0.000175	0.142	0.386
Nicotiana_otophora	0.00355	6.06e-06	0.0011	0.00205	2.84e-07	0.000202	0.147	0.395
Barnesiella	8.19e-06	1.19e-10	4.87e-06	1.48e-06	1.53e-11	1.48e-06	0.156	0.413
Rothia	1.76e-05	7.67e-10	1.24e-05	1.26e-06	4.66e-12	8.16e-07	0.157	0.413
Ruminiclostridium	0.0161	0.000426	0.00923	0.00387	2.14e-05	0.00175	0.161	0.417
Sphingomonas	0.00524	5.32e-05	0.00326	0.001	1.81e-07	0.000161	0.164	0.42
Brachyspira	0	0	0	3.84e-06	5.06e-11	2.69e-06	0.165	0.42
[Eubacterium]_nodatum_group	0.000971	3.43e-07	0.000262	0.00157	1.02e-06	0.000383	0.169	0.424
Anaerovorax	0.000575	3.64e-07	0.00027	0.000222	2.27e-08	5.7e-05	0.171	0.424
Novosphingobium	0.000208	9.19e-08	0.000136	3.56e-05	2.83e-10	6.36e-06	0.174	0.424
Desulfovibrio	0.015	8.69e-05	0.00417	0.00863	5.84e-05	0.00289	0.177	0.424
Gordonibacter	2.02e-05	3.86e-10	8.78e-06	9.28e-05	2.28e-08	5.7e-05	0.178	0.424
Streptomyces	0.000308	2.02e-07	0.000201	5.53e-05	1.06e-09	1.23e-05	0.179	0.424
Lactococcus	0.00114	6.82e-07	0.000369	0.000627	2.29e-07	0.000181	0.185	0.433
Arthrobacter	0.000596	6.25e-07	0.000354	0.000159	9.51e-09	3.69e-05	0.188	0.433
Rhodanobacter	0.000303	9.1e-08	0.000135	0.000135	2.5e-09	1.89e-05	0.189	0.433
DNF00809	1.12e-05	3.94e-10	8.87e-06	2.91e-05	9.62e-10	1.17e-05	0.194	0.44
UBA1819	0.00199	6.38e-06	0.00113	0.000605	2.8e-07	0.0002	0.196	0.44
uncultured_bacterium_c_KD4-96	0.00113	3.79e-06	0.00087	8.45e-05	4.84e-10	8.31e-06	0.199	0.44
Blautia	0.0191	0.000778	0.0125	0.00407	1.04e-05	0.00122	0.2	0.44
Candidatus_Udaeobacter	0.000457	7.18e-07	0.000379	6.63e-06	5.03e-11	2.68e-06	0.206	0.448
Family_XIII_AD3011_group	0.0023	3.87e-06	0.000879	0.00124	1.56e-07	0.000149	0.207	0.448
Christensenellaceae_R-7_group	0.00118	2.12e-06	0.000652	0.000412	2.25e-08	5.67e-05	0.211	0.451
uncultured_bacterium_p_WPS-2	0.000298	2.79e-07	0.000236	2.04e-05	5.14e-10	8.57e-06	0.214	0.452
Pseudomonas	0.00086	1.02e-06	0.000452	0.000335	8.08e-09	3.4e-05	0.221	0.464
Tyzzerella	0.00599	9.72e-05	0.00441	0.000891	1.14e-06	0.000403	0.225	0.468
Streptococcus	0.00511	6.56e-05	0.00362	0.000992	1.63e-07	0.000153	0.233	0.48
Defluviitaleaceae_UCG-011	4.03e-05	5.43e-09	3.3e-05	3.07e-06	1.78e-11	1.6e-06	0.238	0.482
Terrisporobacter	0.000262	2.76e-07	0.000235	0.000533	1.81e-08	5.09e-05	0.239	0.482
Ruminococcaceae_UCG-010	0.000545	2.98e-07	0.000244	0.000257	4.34e-08	7.87e-05	0.241	0.482
uncultured_bacterium_f_Christensenellaceae	0.00062	6.22e-07	0.000353	0.000223	2.52e-08	6e-05	0.247	0.487
Parvibacter	0.000442	5.03e-07	0.000317	0.00086	2.9e-07	0.000203	0.248	0.487
Brevundimonas	0.000361	4.36e-07	0.000295	3.94e-05	5.22e-10	8.63e-06	0.262	0.505
Romboutsia	0.0162	0.000163	0.00571	0.0357	0.00201	0.017	0.262	0.505
Enterobacter	0.00179	1.07e-05	0.00146	0.000206	2.16e-09	1.76e-05	0.264	0.505
Bacillus	0.0015	7.44e-06	0.00122	0.000182	8.35e-09	3.45e-05	0.267	0.506
Sellimonas	5.9e-06	3.52e-11	2.65e-06	2.52e-06	2e-11	1.69e-06	0.271	0.506
Rikenellaceae_RC9_gut_group	0.000167	4.28e-08	9.25e-05	0.00337	6.21e-05	0.00298	0.272	0.506
Helicobacter	0.00153	4.32e-06	0.00093	0.00691	0.000173	0.00497	0.279	0.513
Acinetobacter	0.00188	1.48e-05	0.00172	4.34e-05	5.97e-10	9.23e-06	0.28	0.513
Leucobacter	0.000511	1.04e-06	0.000457	2.6e-05	1.44e-10	4.53e-06	0.282	0.513
Erysipelatoclostridium	2.47e-05	1.78e-09	1.89e-05	0.000954	5.47e-06	0.000884	0.294	0.525
Buttiauxella	0.000228	2.09e-07	0.000205	1.36e-05	7.07e-11	3.18e-06	0.298	0.525
uncultured_bacterium_f_Muribaculaceae	0.121	0.00467	0.0305	0.162	0.00396	0.0238	0.298	0.525
Cutibacterium	0.00043	8.08e-07	0.000402	9.37e-06	3.8e-11	2.33e-06	0.299	0.525
Alcaligenes	0.00105	4.96e-06	0.000996	1.79e-05	9.19e-11	3.62e-06	0.315	0.548
Corynebacterium_1	0.00114	5.83e-06	0.00108	3.14e-05	1.44e-09	1.44e-05	0.321	0.548
Atopostipes	0.000423	8.41e-07	0.00041	1.94e-06	2.63e-11	1.94e-06	0.322	0.548
Lysinibacillus	0.00984	0.000456	0.00955	3.72e-05	1.41e-09	1.42e-05	0.325	0.548
Treponema_2	0.000345	5.61e-07	0.000335	1.74e-06	2.11e-11	1.74e-06	0.326	0.548
Succinivibrio	0.00187	1.66e-05	0.00182	1.01e-05	4.51e-11	2.54e-06	0.329	0.548
Syntrophococcus	0.000749	2.67e-06	0.000731	1.96e-06	1.12e-11	1.26e-06	0.333	0.548
Lachnospiraceae_UCG-008	0.00222	9.44e-06	0.00137	0.0007	2.2e-06	0.000561	0.334	0.548
Megamonas	0.00117	6.36e-06	0.00113	2.02e-05	7.03e-11	3.17e-06	0.334	0.548
Cetobacterium	0.00162	1.23e-05	0.00157	1.61e-05	1.24e-10	4.21e-06	0.343	0.551
Mucispirillum	0.00825	0.000252	0.0071	0.000984	3.25e-06	0.000681	0.345	0.551
Methylobacterium	0.000193	1.65e-08	5.75e-05	0.000121	1.15e-08	4.06e-05	0.346	0.551
Paenibacillus	0.0014	9.37e-06	0.00137	4.32e-06	4.58e-11	2.56e-06	0.348	0.551
Dialister	0.00149	1.07e-05	0.00146	5.46e-06	3.82e-11	2.34e-06	0.35	0.551
Oribacterium	0.00383	7.07e-05	0.00376	1.52e-05	1.85e-10	5.14e-06	0.354	0.551
Prevotella_7	0.0057	0.000157	0.0056	1.5e-05	3.07e-10	6.62e-06	0.355	0.551
Jeotgalicoccus	0.000115	4.27e-08	9.24e-05	1.97e-05	1.57e-09	1.5e-05	0.357	0.551
Prevotellaceae_UCG-001	0.00459	0.0001	0.00447	6.05e-05	6.39e-10	9.56e-06	0.362	0.556
Prevotellaceae_NK3B31_group	0.00033	5.31e-07	0.000326	4.93e-07	1.7e-12	4.93e-07	0.371	0.565
Ochrobactrum	0.00342	5.44e-05	0.0033	8.63e-05	3.04e-09	2.08e-05	0.374	0.565
Ruminococcus_2	0.00121	6.9e-06	0.00117	2.13e-05	2.67e-10	6.17e-06	0.378	0.565
Staphylococcus	0.00164	1.13e-05	0.0015	0.000125	2.76e-08	6.28e-05	0.378	0.565
Prevotella_9	0.00819	0.00032	0.00801	0.000127	3.55e-09	2.25e-05	0.385	0.57
Prevotella_1	0.00231	2.44e-05	0.00221	8.88e-05	5.66e-09	2.84e-05	0.396	0.578
uncultured_bacterium_o_Saccharimonadales	0.000244	2.95e-07	0.000243	4.93e-07	1.7e-12	4.93e-07	0.396	0.578
Libanicoccus	0.000374	6.97e-07	0.000373	0	0	0	0.398	0.578
Collinsella	0.00145	1.05e-05	0.00145	2.48e-06	2.2e-11	1.77e-06	0.411	0.593
Ruminococcaceae_UCG-009	0.00403	3.11e-05	0.00249	0.0015	1.68e-06	0.00049	0.422	0.602
CAG-873	0.000931	4.29e-06	0.000927	7.28e-06	6.1e-11	2.95e-06	0.423	0.602
Muribaculum	0.00159	1.2e-06	0.000489	0.00239	2.98e-06	0.000653	0.458	0.648
Mitsuokella	0.000682	2.3e-06	0.000679	1.26e-05	6.81e-11	3.12e-06	0.465	0.654
Parabacteroides	0.00301	7.27e-06	0.00121	0.0017	2.33e-06	0.000577	0.49	0.681
uncultured_bacterium_f_Chitinophagaceae	4.52e-05	6.88e-10	1.17e-05	6.22e-05	1.17e-09	1.29e-05	0.491	0.681
uncultured_bacterium_o_Gastranaerophilales	0.00774	0.000224	0.0067	0.00119	1.49e-06	0.000461	0.496	0.684
[Eubacterium]_fissicatena_group	1.15e-05	5.07e-10	1.01e-05	0.000165	1.75e-07	0.000158	0.507	0.694
[Ruminococcus]_torques_group	0.000171	1.33e-07	0.000163	1.32e-05	8.26e-11	3.43e-06	0.509	0.694
Escherichia-Shigella	0.0233	0.00268	0.0232	0.00104	8.69e-08	0.000111	0.52	0.704
[Eubacterium]_eligens_group	0.000656	2.06e-06	0.000643	4.37e-05	4.19e-10	7.74e-06	0.528	0.707
uncultured_bacterium_o_Subgroup_2	0.000315	3.67e-07	0.000271	5.69e-05	5.33e-10	8.73e-06	0.528	0.707
Megasphaera	0.00881	0.000371	0.00861	0.000812	1.25e-07	0.000134	0.552	0.733
ASF356	0.000444	5.76e-07	0.00034	0.000122	4.67e-08	8.17e-05	0.557	0.733
Triticum_urartu	0.00016	6.45e-08	0.000114	5.48e-05	6.8e-10	9.85e-06	0.558	0.733
Ruminiclostridium_6	0.000158	6.53e-08	0.000114	5.37e-05	3.21e-10	6.78e-06	0.57	0.74
Ruminococcus_1	6.84e-05	1.35e-08	5.2e-05	2.1e-05	9.19e-11	3.62e-06	0.57	0.74
Lachnoclostridium	0.0181	0.000143	0.00535	0.0131	2.36e-05	0.00184	0.584	0.749
Sporosarcina	1.95e-05	1.12e-10	4.74e-06	6.68e-05	2e-08	5.35e-05	0.59	0.749
Alloprevotella	0.00349	4.03e-05	0.00284	0.000993	5.7e-08	9.02e-05	0.593	0.749
Faecalibacterium	0.00093	4.21e-06	0.000917	0.000127	2.28e-09	1.8e-05	0.594	0.749
Ruminococcaceae_UCG-002	0.00194	1.84e-05	0.00192	0.000261	1.71e-09	1.56e-05	0.595	0.749
Enteractinococcus	2e-05	3.34e-10	8.17e-06	4.27e-05	4.33e-09	2.49e-05	0.601	0.753
Nitrospira	0.000118	8.66e-09	4.16e-05	7.79e-05	4.57e-09	2.56e-05	0.632	0.781
Turicibacter	0.000229	1.53e-07	0.000175	0.000382	3.65e-08	7.22e-05	0.634	0.781
uncultured_bacterium_o_Rhodospirillales	0.000108	9.51e-09	4.36e-05	0.000171	3.08e-08	6.63e-05	0.639	0.781
Enterococcus	0.000347	3.99e-07	0.000282	0.000121	1.29e-09	1.36e-05	0.64	0.781
Anaerocolumna	6.83e-05	5.22e-09	3.23e-05	4.12e-05	9.52e-10	1.17e-05	0.645	0.781
uncultured_bacterium_f_ML635J-40_aquatic_group	0.000217	7.59e-08	0.000123	0.000115	1e-08	3.78e-05	0.645	0.781
[Eubacterium]_brachy_group	0.000392	2.06e-07	0.000203	0.000235	4.07e-08	7.62e-05	0.681	0.82
uncultured_bacterium_o_Mollicutes_RF39	0.00037	6.4e-07	0.000358	0.000116	1.14e-08	4.04e-05	0.69	0.822
[Eubacterium]_xylanophilum_group	0.000556	3.4e-07	0.000261	0.000362	6.41e-08	9.57e-05	0.692	0.822
uncultured_bacterium_f_Eggerthellaceae	0.000458	6.25e-07	0.000353	0.00021	8.02e-09	3.39e-05	0.693	0.822
Gemella	0.00138	3.35e-06	0.000818	0.000799	3.64e-07	0.000228	0.701	0.823
Ruminococcaceae_UCG-004	0.000771	9.84e-07	0.000444	0.000442	2.55e-07	0.000191	0.702	0.823
Leuconostoc	0.000153	1.99e-08	6.31e-05	0.00011	2.43e-09	1.86e-05	0.71	0.825
Parasutterella	0.00312	1.05e-05	0.00145	0.00208	2.78e-06	0.00063	0.712	0.825
Rikenella	0.00598	7.45e-05	0.00386	0.0029	5.41e-05	0.00278	0.717	0.827
Lactobacillus	0.0171	0.000474	0.00973	0.0109	0.000122	0.00418	0.748	0.856
Lachnospiraceae_XPB1014_group	0.0013	8.15e-06	0.00128	0.000566	3.77e-08	7.33e-05	0.754	0.856
Clostridium_sensu_stricto_1	0.00193	1e-05	0.00142	0.00328	2.62e-05	0.00194	0.757	0.856
Dorea	0.00031	4.74e-07	0.000308	0.000133	3.85e-08	7.42e-05	0.758	0.856
Lachnospiraceae_UCG-006	0.00598	2.72e-05	0.00233	0.00463	6.12e-06	0.000935	0.768	0.863
A2	0.0029	1.91e-05	0.00195	0.0019	2.3e-06	0.000573	0.789	0.878
uncultured_bacterium_f_Burkholderiaceae	0.000111	3.51e-09	2.65e-05	9.06e-05	6.57e-09	3.06e-05	0.789	0.878
Ruminococcaceae_UCG-014	0.00884	3.26e-05	0.00255	0.0074	1.8e-05	0.0016	0.794	0.879
Sphingobacterium	4.28e-05	6.77e-10	1.16e-05	3.62e-05	4.57e-10	8.08e-06	0.799	0.88
Negativibacillus	0.000465	1.59e-07	0.000178	0.000366	1.06e-07	0.000123	0.805	0.882
Ruminococcaceae_NK4A214_group	0.00128	3.06e-06	0.000782	0.000913	6.37e-07	0.000302	0.811	0.884
[Eubacterium]_coprostanoligenes_group	0.00128	3.07e-06	0.000784	0.00161	2.36e-06	0.00058	0.854	0.925
uncultured_bacterium_o_KF-JG30-C25	0.000239	9.02e-09	4.25e-05	0.000263	2.89e-08	6.43e-05	0.866	0.925
Ruminococcaceae_UCG-005	0.00132	6.59e-06	0.00115	0.000955	3.04e-08	6.59e-05	0.867	0.925
Subdoligranulum	0.000401	5.5e-07	0.000332	0.000297	7.25e-09	3.22e-05	0.867	0.925
Paraprevotella	6.32e-06	4.4e-11	2.97e-06	8.86e-06	4.24e-10	7.79e-06	0.87	0.925
Hymenobacter	7.23e-05	1.64e-09	1.81e-05	6.54e-05	2.91e-09	2.04e-05	0.894	0.946
Enterorhabdus	0.00405	2.22e-05	0.00211	0.00354	3.1e-06	0.000665	0.903	0.951
Candidatus_Saccharimonas	0.00643	4.96e-05	0.00315	0.00579	9.8e-06	0.00118	0.92	0.964
Odoribacter	0.00985	0.000105	0.00459	0.0108	8.43e-05	0.00347	0.931	0.971
Corynebacterium	4.47e-05	4.61e-09	3.04e-05	3.98e-05	1.72e-09	1.57e-05	0.938	0.974
Bifidobacterium	0.012	0.000581	0.0108	0.0105	0.000111	0.00398	0.944	0.976
Phascolarctobacterium	0.000259	3.09e-07	0.000249	0.000237	5.31e-09	2.75e-05	0.959	0.979
Alistipes	0.0193	0.000257	0.00717	0.0203	0.000577	0.00908	0.961	0.979
Serratia	0.000385	2.06e-07	0.000203	0.000406	1.22e-07	0.000132	0.962	0.979
Acidiphilium	8.59e-05	1.22e-09	1.56e-05	8.81e-05	4.43e-09	2.52e-05	0.966	0.98
uncultured_bacterium_f_Desulfovibrionaceae	0.0128	0.000249	0.00705	0.0123	0.000361	0.00718	0.978	0.987
Chujaibacter	0.000603	7.15e-09	3.78e-05	0.000604	1.13e-07	0.000127	0.991	0.995
Coprococcus_3	0.000164	1.3e-07	0.000161	0.000164	1.65e-09	1.54e-05	0.995	0.995
