# Supplementary material for: Naringin Attenuates High Fat Diet Induced Non-alcoholic Fatty Liver Disease and Gut Bacterial Dysbiosis in Mice
Source: Front Microbiol. 2020 Nov 13;11:585066. doi: 10.3389/fmicb.2020.585066 (PMC7691324; doi:10.3389/fmicb.2020.585066)
Supplement: Supplementary file 5 [file Table_3.XLS]

genus	Mean(NDce)	Variance(NDce)	Std.err(NDce)	Mean(HFDce)	Variance(HFDce)	Std.err(HFDce)	P value	Q value
[Ruminococcus]_torques_group	6.39E-04	1.45E-09	1.90E-05	1.59E-05	2.20E-10	5.61E-06	0.00E+00	0.00E+00
Clostridium_sensu_stricto_13	1.01E-05	7.82E-12	1.40E-06	3.70E-04	1.66E-09	1.54E-05	1.90E-05	2.07E-03
Barnesiella	4.85E-03	2.47E-07	2.49E-04	6.20E-06	2.54E-11	1.90E-06	3.79E-05	2.76E-03
Megasphaera	4.08E-05	7.35E-10	1.36E-05	8.94E-04	1.22E-08	4.17E-05	5.69E-05	3.10E-03
Terrisporobacter	3.09E-05	1.83E-10	6.77E-06	6.66E-04	1.15E-08	4.06E-05	7.58E-05	3.31E-03
Faecalibacterium	1.55E-03	3.01E-08	8.67E-05	1.99E-04	1.76E-09	1.59E-05	9.48E-05	3.44E-03
Lachnospiraceae_XPB1014_group	2.01E-05	3.06E-10	8.75E-06	1.03E-03	3.71E-08	7.28E-05	1.14E-04	3.54E-03
Agathobacter	4.22E-06	2.78E-11	2.63E-06	5.74E-04	1.28E-08	4.27E-05	1.37E-04	3.75E-03
uncultured_bacterium_f_p-251-o5	0.00E+00	0.00E+00	0.00E+00	9.31E-04	4.67E-08	8.16E-05	1.66E-04	4.02E-03
Phascolarctobacterium	1.28E-05	2.16E-10	7.35E-06	2.31E-04	2.99E-09	2.07E-05	2.09E-04	4.45E-03
Faecalibaculum	4.77E-03	1.24E-07	1.76E-04	1.87E-01	2.36E-03	1.84E-02	2.27E-04	4.45E-03
Ruminococcaceae_UCG-002	7.74E-05	2.70E-10	8.21E-06	3.30E-04	5.33E-09	2.76E-05	2.46E-04	4.45E-03
Coprococcus_3	1.53E-06	9.42E-12	1.53E-06	3.14E-04	9.06E-09	3.60E-05	2.65E-04	4.45E-03
Subdoligranulum	2.17E-04	2.92E-10	8.54E-06	4.17E-04	3.56E-09	2.25E-05	3.03E-04	4.62E-03
Sellimonas	2.41E-04	3.32E-09	2.88E-05	3.11E-06	9.90E-12	1.19E-06	3.22E-04	4.62E-03
Streptococcus	2.64E-04	6.75E-09	4.11E-05	9.47E-04	4.03E-08	7.59E-05	3.46E-04	4.62E-03
Escherichia-Shigella	1.39E-04	8.04E-09	4.48E-05	8.62E-04	4.62E-08	8.12E-05	3.65E-04	4.62E-03
Bacteroides	1.24E-02	6.71E-06	1.29E-03	2.08E-03	1.28E-06	4.27E-04	3.84E-04	4.62E-03
Christensenellaceae_R-7_group	1.07E-04	6.87E-10	1.31E-05	5.53E-04	2.60E-08	6.09E-05	4.03E-04	4.62E-03
Prevotella_9	4.07E-05	9.29E-10	1.52E-05	2.30E-04	4.05E-09	2.41E-05	4.88E-04	5.32E-03
Parabacteroides	1.98E-03	9.21E-08	1.52E-04	6.34E-04	1.59E-07	1.51E-04	5.50E-04	5.71E-03
Oscillibacter	2.23E-03	3.97E-07	3.15E-04	2.34E-02	8.82E-05	3.55E-03	6.21E-04	6.15E-03
Intestinimonas	3.74E-03	4.53E-06	1.06E-03	2.02E-02	5.49E-05	2.80E-03	7.30E-04	6.92E-03
Mitsuokella	2.86E-06	1.09E-11	1.65E-06	3.90E-04	3.50E-08	7.07E-05	7.63E-04	6.93E-03
Ruminiclostridium_9	5.07E-03	3.16E-06	8.89E-04	1.68E-02	3.16E-05	2.12E-03	9.43E-04	8.19E-03
Fusobacterium	2.04E-05	4.72E-11	3.44E-06	1.12E-03	3.40E-07	2.20E-04	9.81E-04	8.19E-03
Turicibacter	2.63E-04	2.73E-08	8.27E-05	8.20E-04	4.10E-08	7.65E-05	1.01E-03	8.19E-03
Butyricicoccus	1.50E-03	9.02E-08	1.50E-04	4.96E-04	1.94E-07	1.66E-04	1.47E-03	1.14E-02
uncultured_bacterium_f_Muribaculaceae	2.36E-01	2.79E-03	2.64E-02	9.95E-02	2.00E-03	1.69E-02	1.72E-03	1.29E-02
Lachnospira	1.50E-06	8.96E-12	1.50E-06	4.38E-05	6.69E-10	9.78E-06	1.85E-03	1.34E-02
Ruminiclostridium	8.40E-04	5.24E-08	1.14E-04	8.86E-03	2.47E-05	1.88E-03	1.91E-03	1.34E-02
[Eubacterium]_eligens_group	8.48E-06	5.14E-11	3.59E-06	3.75E-05	2.95E-10	6.49E-06	3.09E-03	2.11E-02
Parasutterella	4.25E-03	3.14E-06	8.87E-04	8.61E-04	2.97E-07	2.06E-04	3.90E-03	2.58E-02
Ruminococcaceae_UCG-005	6.64E-04	8.42E-10	1.45E-05	9.40E-04	3.77E-08	7.34E-05	4.07E-03	2.60E-02
Ruminococcaceae_UCG-009	3.53E-04	1.16E-08	5.38E-05	2.47E-03	2.30E-06	5.73E-04	4.18E-03	2.60E-02
Lachnoclostridium	9.69E-03	4.53E-06	1.06E-03	2.80E-02	1.72E-04	4.96E-03	4.61E-03	2.79E-02
Harryflintia	1.92E-05	1.69E-10	6.49E-06	1.00E-03	5.46E-07	2.79E-04	5.43E-03	3.20E-02
Anaerovorax	1.99E-05	1.68E-10	6.47E-06	8.88E-05	2.44E-09	1.87E-05	5.58E-03	3.20E-02
Bilophila	3.39E-04	9.15E-08	1.51E-04	2.08E-02	2.78E-04	6.30E-03	7.94E-03	4.44E-02
Campylobacter	1.40E-06	7.81E-12	1.40E-06	5.12E-04	1.87E-07	1.63E-04	9.84E-03	5.36E-02
Dubosiella	7.95E-03	2.45E-05	2.47E-03	2.64E-02	2.14E-04	5.53E-03	1.10E-02	5.85E-02
Ruminiclostridium_5	2.80E-03	1.38E-06	5.88E-04	8.70E-03	2.42E-05	1.86E-03	1.20E-02	6.21E-02
uncultured_bacterium_f_Clostridiales_vadinBB60_group	5.22E-05	1.12E-09	1.67E-05	5.94E-04	2.25E-07	1.79E-04	1.23E-02	6.22E-02
Family_XIII_AD3011_group	3.16E-04	7.52E-08	1.37E-04	8.27E-04	7.71E-08	1.05E-04	1.34E-02	6.65E-02
Marvinbryantia	1.68E-03	1.07E-06	5.18E-04	1.48E-04	7.15E-09	3.20E-05	1.38E-02	6.68E-02
Candidatus_Arthromitus	7.18E-05	4.00E-10	1.00E-05	2.21E-05	1.37E-09	1.40E-05	1.49E-02	6.69E-02
Lachnospiraceae_NK4A136_group	1.14E-01	4.25E-03	3.26E-02	1.95E-02	3.73E-05	2.31E-03	1.49E-02	6.69E-02
Prevotellaceae_UCG-001	1.31E-03	7.65E-07	4.37E-04	5.11E-05	1.55E-10	4.71E-06	1.51E-02	6.69E-02
Alloprevotella	1.22E-02	6.14E-05	3.92E-03	9.10E-04	5.06E-08	8.50E-05	1.53E-02	6.69E-02
Desulfovibrio	1.26E-02	1.16E-04	5.38E-03	4.14E-02	5.00E-04	8.45E-03	1.54E-02	6.69E-02
Ochrobactrum	4.94E-05	1.47E-10	6.06E-06	1.27E-04	5.21E-09	2.73E-05	1.87E-02	7.90E-02
Roseiarcus	4.19E-06	7.02E-11	4.19E-06	1.71E-05	2.75E-11	1.98E-06	1.88E-02	7.90E-02
[Eubacterium]_xylanophilum_group	7.77E-03	2.77E-05	2.63E-03	6.83E-04	1.30E-07	1.36E-04	2.24E-02	9.21E-02
Corynebacterium	1.15E-05	4.30E-11	3.28E-06	2.36E-05	6.74E-11	3.10E-06	2.30E-02	9.30E-02
Ruminococcaceae_UCG-004	1.04E-04	3.42E-08	9.25E-05	4.67E-04	8.51E-08	1.10E-04	2.99E-02	1.18E-01
uncultured_bacterium_f_Christensenellaceae	1.49E-04	2.63E-08	8.11E-05	4.30E-04	4.22E-08	7.76E-05	3.09E-02	1.20E-01
Allobaculum	1.84E-01	2.00E-02	7.07E-02	9.34E-03	8.45E-06	1.10E-03	3.27E-02	1.21E-01
Romboutsia	1.33E-03	7.68E-09	4.38E-05	1.16E-02	1.22E-04	4.17E-03	3.33E-02	1.21E-01
Negativibacillus	6.95E-05	2.57E-09	2.53E-05	7.36E-04	5.09E-07	2.70E-04	3.37E-02	1.21E-01
Serratia	5.88E-05	1.62E-09	2.01E-05	6.62E-04	4.21E-07	2.45E-04	3.43E-02	1.21E-01
Brevundimonas	6.07E-05	5.74E-11	3.79E-06	4.25E-05	2.91E-10	6.45E-06	3.48E-02	1.21E-01
Anaerocolumna	7.23E-06	3.22E-11	2.84E-06	1.95E-05	1.22E-10	4.18E-06	3.49E-02	1.21E-01
Mesorhizobium	3.96E-05	3.56E-10	9.44E-06	7.12E-05	5.53E-10	8.89E-06	3.53E-02	1.21E-01
uncultured_bacterium_c_KD4-96	7.37E-05	1.64E-10	6.40E-06	1.19E-04	2.15E-09	1.75E-05	3.54E-02	1.21E-01
uncultured_bacterium	4.26E-04	2.82E-09	2.65E-05	3.50E-04	2.13E-09	1.74E-05	3.81E-02	1.28E-01
Muribaculum	5.20E-03	1.07E-05	1.64E-03	1.27E-03	7.11E-07	3.19E-04	3.93E-02	1.30E-01
Parvibacter	3.22E-04	3.36E-08	9.17E-05	9.52E-04	4.43E-07	2.52E-04	4.00E-02	1.30E-01
Acidothermus	1.74E-05	1.22E-10	5.52E-06	4.11E-06	1.64E-11	1.53E-06	4.16E-02	1.34E-01
Anaerotruncus	1.06E-03	2.29E-07	2.39E-04	3.26E-03	6.07E-06	9.31E-04	4.46E-02	1.41E-01
uncultured_bacterium_o_Mollicutes_RF39	2.68E-04	2.26E-08	7.52E-05	9.89E-05	2.75E-09	1.98E-05	5.43E-02	1.69E-01
Megamonas	3.77E-05	4.70E-11	3.43E-06	2.27E-05	2.59E-10	6.09E-06	5.59E-02	1.71E-01
Family_XIII_UCG-001	2.09E-04	1.66E-08	6.45E-05	6.74E-05	1.31E-09	1.37E-05	5.64E-02	1.71E-01
Rikenellaceae_RC9_gut_group	2.90E-05	7.33E-10	1.35E-05	1.01E-03	1.53E-06	4.68E-04	6.14E-02	1.83E-01
Ruminiclostridium_6	1.48E-03	1.85E-06	6.81E-04	5.13E-05	3.35E-10	6.91E-06	6.23E-02	1.83E-01
Candidatus_Koribacter	4.29E-06	8.28E-12	1.44E-06	1.17E-05	7.40E-11	3.25E-06	6.47E-02	1.88E-01
Dorea	4.39E-06	8.67E-12	1.47E-06	1.32E-04	2.69E-08	6.20E-05	6.62E-02	1.90E-01
Lysinimonas	1.20E-04	2.51E-10	7.92E-06	8.31E-05	1.83E-09	1.62E-05	6.78E-02	1.92E-01
Coriobacteriaceae_UCG-002	1.06E-02	6.85E-05	4.14E-03	2.99E-02	5.19E-04	8.61E-03	7.05E-02	1.97E-01
Ruminococcaceae_UCG-013	2.56E-03	5.14E-06	1.13E-03	3.06E-04	2.31E-08	5.74E-05	7.42E-02	2.05E-01
uncultured_bacterium_f_Micropepsaceae	6.77E-05	1.31E-10	5.72E-06	8.93E-05	6.21E-10	9.42E-06	7.86E-02	2.14E-01
UBA1819	4.38E-04	7.86E-08	1.40E-04	1.56E-03	2.24E-06	5.66E-04	8.19E-02	2.17E-01
uncultured_bacterium_f_Erysipelotrichaceae	5.87E-04	2.26E-07	2.38E-04	1.08E-03	7.15E-08	1.01E-04	8.25E-02	2.17E-01
Candidatus_Solibacter	8.12E-05	1.11E-10	5.26E-06	1.35E-04	5.29E-09	2.75E-05	8.27E-02	2.17E-01
[Eubacterium]_coprostanoligenes_group	9.60E-03	7.83E-05	4.42E-03	1.37E-03	8.60E-07	3.50E-04	9.27E-02	2.41E-01
Conexibacter	1.03E-05	3.63E-11	3.01E-06	2.64E-05	4.76E-10	8.25E-06	9.50E-02	2.44E-01
Ruminococcus_1	1.60E-03	2.97E-06	8.61E-04	2.91E-05	9.92E-10	1.19E-05	9.71E-02	2.46E-01
Lactococcus	7.79E-04	5.25E-09	3.62E-05	4.90E-04	1.67E-07	1.54E-04	9.81E-02	2.46E-01
uncultured_bacterium_f_ML635J-40_aquatic_group	6.97E-05	1.18E-09	1.72E-05	3.29E-05	8.17E-10	1.08E-05	9.96E-02	2.47E-01
Jatrophihabitans	9.81E-05	2.64E-10	8.12E-06	1.57E-04	7.23E-09	3.21E-05	1.07E-01	2.62E-01
uncultured_bacterium_o_Gaiellales	1.06E-04	3.50E-10	9.36E-06	1.60E-04	6.20E-09	2.98E-05	1.10E-01	2.66E-01
Roseburia	1.59E-02	2.03E-04	7.12E-03	3.53E-02	5.44E-04	8.82E-03	1.17E-01	2.76E-01
[Eubacterium]_brachy_group	4.35E-04	8.83E-08	1.49E-04	7.64E-04	1.03E-07	1.21E-04	1.17E-01	2.76E-01
Gemella	3.93E-04	3.43E-08	9.26E-05	6.58E-04	1.19E-07	1.30E-04	1.28E-01	2.98E-01
Globicatella	1.50E-06	8.96E-12	1.50E-06	6.66E-06	5.27E-11	2.74E-06	1.29E-01	2.98E-01
Paenibacillus	6.98E-06	4.64E-11	3.41E-06	1.11E-06	8.65E-12	1.11E-06	1.32E-01	2.98E-01
Cetobacterium	2.72E-05	7.59E-11	4.36E-06	1.83E-05	7.78E-11	3.33E-06	1.34E-01	2.98E-01
Prevotella_1	1.89E-04	4.86E-09	3.48E-05	1.20E-04	4.01E-09	2.39E-05	1.34E-01	2.98E-01
uncultured_bacterium_f_Xanthobacteraceae	8.56E-05	3.00E-10	8.66E-06	1.13E-04	1.47E-09	1.45E-05	1.34E-01	2.98E-01
Ruminococcaceae_UCG-010	3.88E-04	4.73E-08	1.09E-04	1.95E-04	1.68E-08	4.90E-05	1.36E-01	3.00E-01
uncultured_bacterium_f_Ruminococcaceae	2.17E-02	3.31E-04	9.10E-03	3.72E-02	9.86E-05	3.75E-03	1.46E-01	3.19E-01
Acidiphilium	6.71E-05	1.02E-09	1.59E-05	1.41E-04	1.42E-08	4.50E-05	1.52E-01	3.27E-01
uncultured_bacterium_f_Desulfovibrionaceae	2.42E-03	4.01E-06	1.00E-03	5.08E-02	6.94E-03	3.15E-02	1.57E-01	3.35E-01
Allorhizobium-Neorhizobium-Pararhizobium-Rhizobium	1.22E-04	8.00E-10	1.41E-05	1.62E-04	3.32E-09	2.18E-05	1.66E-01	3.51E-01
Prevotella_7	2.82E-05	3.22E-10	8.98E-06	1.27E-05	1.85E-10	5.14E-06	1.68E-01	3.52E-01
uncultured_bacterium_f_Acetobacteraceae	5.06E-05	8.26E-11	4.55E-06	9.18E-05	5.30E-09	2.75E-05	1.73E-01	3.60E-01
Nitrospira	1.22E-04	1.24E-09	1.76E-05	7.72E-05	4.69E-09	2.59E-05	1.83E-01	3.76E-01
Burkholderia-Caballeronia-Paraburkholderia	5.88E-05	5.05E-10	1.12E-05	9.75E-05	4.40E-09	2.51E-05	1.93E-01	3.93E-01
[Eubacterium]_nodatum_group	5.25E-04	9.66E-08	1.55E-04	8.05E-04	1.32E-07	1.37E-04	2.12E-01	4.28E-01
Ruminococcaceae_UCG-014	1.22E-02	1.21E-04	5.51E-03	4.79E-03	4.77E-06	8.26E-04	2.20E-01	4.40E-01
uncultured_bacterium_f_Lachnospiraceae	4.98E-02	3.43E-04	9.26E-03	6.64E-02	5.15E-04	8.58E-03	2.24E-01	4.41E-01
uncultured_bacterium_o_KF-JG30-C25	2.13E-04	3.95E-10	9.93E-06	3.90E-04	1.26E-07	1.34E-04	2.24E-01	4.41E-01
Pseudomonas	3.17E-04	8.74E-09	4.67E-05	3.96E-04	1.08E-08	3.93E-05	2.31E-01	4.49E-01
Peptococcus	1.87E-04	4.55E-08	1.07E-04	4.36E-04	1.93E-07	1.66E-04	2.44E-01	4.67E-01
uncultured_bacterium_o_IMCC26256	4.20E-05	7.95E-10	1.41E-05	8.26E-05	5.83E-09	2.89E-05	2.44E-01	4.67E-01
Rhodanobacter	1.45E-04	6.89E-10	1.31E-05	1.99E-04	1.18E-08	4.10E-05	2.46E-01	4.67E-01
Alistipes	2.21E-02	4.98E-05	3.53E-03	1.26E-02	3.33E-04	6.90E-03	2.57E-01	4.84E-01
Odoribacter	1.42E-03	1.26E-06	5.62E-04	5.22E-03	6.55E-05	3.06E-03	2.62E-01	4.86E-01
Mucispirillum	3.53E-04	7.99E-09	4.47E-05	1.07E-03	2.44E-06	5.91E-04	2.63E-01	4.86E-01
Helicobacter	2.55E-03	1.52E-06	6.16E-04	1.15E-02	3.84E-04	7.41E-03	2.67E-01	4.89E-01
Chujaibacter	5.59E-04	1.38E-08	5.87E-05	8.19E-04	3.03E-07	2.08E-04	2.69E-01	4.89E-01
Pseudolabrys	5.50E-05	5.75E-11	3.79E-06	6.26E-05	1.88E-10	5.18E-06	2.73E-01	4.91E-01
Tyzzerella	3.25E-04	7.48E-09	4.32E-05	6.38E-04	4.76E-07	2.61E-04	2.75E-01	4.92E-01
Blautia	5.12E-03	4.97E-05	3.53E-03	1.55E-02	4.62E-04	8.12E-03	2.80E-01	4.96E-01
Candidatus_Saccharimonas	7.82E-03	3.40E-05	2.92E-03	4.28E-03	5.22E-06	8.64E-04	2.84E-01	4.99E-01
CAG-873	0.00E+00	0.00E+00	0.00E+00	3.05E-06	8.52E-12	1.10E-06	3.05E-01	5.32E-01
Lachnospiraceae_UCG-008	2.04E-05	3.94E-10	9.92E-06	4.55E-03	1.18E-04	4.11E-03	3.11E-01	5.36E-01
Ruminococcaceae_UCG-003	2.26E-04	5.68E-09	3.77E-05	5.51E-04	6.04E-07	2.94E-04	3.12E-01	5.36E-01
Acidipila	1.08E-04	5.43E-10	1.16E-05	1.63E-04	1.74E-08	4.99E-05	3.24E-01	5.52E-01
Brachyspira	1.53E-06	9.42E-12	1.53E-06	5.16E-04	1.66E-06	4.87E-04	3.36E-01	5.63E-01
Caenimonas	6.57E-05	1.78E-09	2.11E-05	4.11E-05	6.69E-10	9.78E-06	3.36E-01	5.63E-01
Defluviitaleaceae_UCG-011	4.15E-04	6.22E-07	3.94E-04	2.00E-06	6.44E-12	9.59E-07	3.41E-01	5.64E-01
[Eubacterium]_fissicatena_group	1.31E-03	4.76E-06	1.09E-03	1.63E-04	1.58E-07	1.50E-04	3.44E-01	5.64E-01
Nicotiana_otophora	2.39E-03	1.34E-08	5.79E-05	2.52E-03	8.06E-08	1.07E-04	3.45E-01	5.64E-01
Buttiauxella	1.43E-05	5.07E-11	3.56E-06	2.06E-05	1.70E-10	4.93E-06	3.47E-01	5.64E-01
Ruminococcus_2	5.47E-05	1.87E-10	6.84E-06	6.86E-05	9.69E-10	1.18E-05	3.57E-01	5.76E-01
Leuconostoc	9.32E-05	4.46E-10	1.06E-05	6.71E-05	3.97E-09	2.38E-05	3.69E-01	5.91E-01
Bifidobacterium	2.58E-03	3.26E-06	9.02E-04	5.57E-03	5.80E-05	2.88E-03	3.77E-01	6.00E-01
Atopostipes	2.75E-05	2.64E-09	2.57E-05	2.38E-06	3.95E-11	2.38E-06	3.90E-01	6.06E-01
Novosphingobium	5.88E-05	5.83E-10	1.21E-05	4.54E-05	3.25E-10	6.82E-06	3.90E-01	6.06E-01
Rikenella	2.34E-03	3.44E-06	9.28E-04	1.07E-03	6.08E-06	9.32E-04	3.95E-01	6.06E-01
Streptomyces	8.46E-05	6.64E-10	1.29E-05	7.05E-05	3.54E-10	7.11E-06	3.95E-01	6.06E-01
Lactobacillus	1.89E-02	3.88E-04	9.85E-03	9.12E-03	4.55E-05	2.55E-03	3.97E-01	6.06E-01
Sphingobacterium	3.01E-05	2.04E-10	7.15E-06	4.10E-05	5.42E-10	8.80E-06	3.98E-01	6.06E-01
Paraprevotella	7.81E-05	2.33E-08	7.63E-05	5.17E-06	5.66E-11	2.84E-06	4.01E-01	6.07E-01
Facklamia	1.36E-05	1.87E-10	6.83E-06	6.14E-06	1.03E-10	3.83E-06	4.06E-01	6.10E-01
Enteractinococcus	2.48E-04	2.16E-07	2.33E-04	2.88E-05	1.64E-09	1.53E-05	4.11E-01	6.13E-01
Arthrobacter	2.37E-04	6.38E-09	3.99E-05	1.90E-04	8.04E-09	3.39E-05	4.26E-01	6.32E-01
Pseudogracilibacillus	6.27E-05	1.39E-08	5.90E-05	1.01E-05	2.58E-10	6.07E-06	4.42E-01	6.51E-01
A2	4.01E-03	9.05E-06	1.50E-03	6.62E-03	5.07E-05	2.69E-03	4.66E-01	6.81E-01
Corynebacterium_1	1.15E-04	3.96E-08	9.95E-05	3.22E-05	1.06E-09	1.23E-05	4.79E-01	6.97E-01
Erysipelatoclostridium	3.91E-04	8.77E-10	1.48E-05	2.32E-04	2.61E-07	1.93E-04	4.83E-01	6.97E-01
uncultured_bacterium_f_Peptococcaceae	2.58E-03	1.75E-06	6.61E-04	3.14E-03	5.27E-07	2.74E-04	4.98E-01	7.14E-01
Sporosarcina	1.13E-04	3.96E-08	9.96E-05	3.29E-05	2.76E-09	1.98E-05	5.01E-01	7.14E-01
Hymenobacter	1.23E-04	3.08E-10	8.77E-06	9.75E-05	6.94E-09	3.15E-05	5.09E-01	7.17E-01
uncultured_bacterium_o_Subgroup_2	4.48E-05	6.26E-10	1.25E-05	5.95E-05	1.43E-09	1.43E-05	5.10E-01	7.17E-01
Oribacterium	3.22E-05	8.80E-10	1.48E-05	2.02E-05	2.51E-10	5.99E-06	5.21E-01	7.27E-01
uncultured_bacterium_p_WPS-2	1.33E-05	3.80E-11	3.08E-06	2.06E-05	6.29E-10	9.48E-06	5.30E-01	7.31E-01
GCA-900066575	4.49E-03	3.93E-06	9.91E-04	3.61E-03	3.24E-06	6.80E-04	5.33E-01	7.31E-01
Leucobacter	3.73E-05	7.97E-11	4.46E-06	3.19E-05	2.47E-10	5.94E-06	5.34E-01	7.31E-01
agricultural_soil_bacterium_SC-I-84	7.21E-05	1.53E-10	6.18E-06	8.16E-05	1.01E-09	1.20E-05	5.52E-01	7.52E-01
Libanicoccus	0.00E+00	0.00E+00	0.00E+00	3.33E-06	7.78E-11	3.33E-06	5.56E-01	7.53E-01
Phenylobacterium	2.04E-05	6.30E-11	3.97E-06	2.40E-05	1.05E-10	3.88E-06	5.89E-01	7.83E-01
Lysinibacillus	5.23E-05	1.43E-09	1.89E-05	3.81E-05	8.98E-10	1.13E-05	5.90E-01	7.83E-01
Enterobacter	2.73E-04	7.69E-11	4.39E-06	2.52E-04	7.29E-09	3.23E-05	5.95E-01	7.83E-01
Terrabacter	5.48E-05	1.64E-10	6.40E-06	4.86E-05	3.88E-10	7.44E-06	5.95E-01	7.83E-01
uncultured_bacterium_f_Burkholderiaceae	1.34E-04	8.66E-09	4.65E-05	9.96E-05	5.31E-09	2.76E-05	5.96E-01	7.83E-01
uncultured_bacterium_o_Gastranaerophilales	1.42E-03	1.39E-08	5.90E-05	1.10E-03	1.90E-06	5.21E-04	6.05E-01	7.89E-01
Alcaligenes	2.81E-05	4.93E-10	1.11E-05	2.12E-05	2.01E-11	1.70E-06	6.08E-01	7.90E-01
Rhodoplanes	7.02E-06	4.63E-11	3.40E-06	4.96E-06	1.42E-11	1.42E-06	6.43E-01	8.27E-01
Sphingomonas	1.16E-03	3.75E-08	9.68E-05	1.27E-03	2.24E-07	1.79E-04	6.49E-01	8.27E-01
uncultured_bacterium_o_Rhodospirillales	1.48E-04	1.93E-08	6.95E-05	1.04E-04	1.16E-08	4.07E-05	6.49E-01	8.27E-01
Akkermansia	7.07E-02	6.02E-03	3.88E-02	4.55E-02	5.40E-03	2.78E-02	6.63E-01	8.41E-01
Granulicella	1.13E-05	1.36E-10	5.84E-06	1.55E-05	2.24E-10	5.66E-06	6.72E-01	8.47E-01
Jeotgalicoccus	4.06E-05	2.25E-09	2.37E-05	2.77E-05	7.45E-10	1.03E-05	6.84E-01	8.55E-01
Massilia	5.47E-05	3.05E-10	8.73E-06	4.87E-05	4.89E-10	8.36E-06	6.86E-01	8.55E-01
Mycobacterium	2.75E-05	8.24E-11	4.54E-06	3.20E-05	4.43E-10	7.96E-06	6.91E-01	8.56E-01
Bryobacter	8.13E-05	1.45E-09	1.90E-05	7.11E-05	7.72E-10	1.05E-05	7.03E-01	8.63E-01
Clostridium_sensu_stricto_1	2.89E-03	2.58E-05	2.54E-03	4.62E-03	5.18E-05	2.72E-03	7.06E-01	8.63E-01
Microbacterium	1.06E-04	1.03E-09	1.60E-05	1.16E-04	1.65E-09	1.54E-05	7.08E-01	8.63E-01
Dialister	8.24E-06	1.09E-10	5.23E-06	1.08E-05	3.27E-11	2.16E-06	7.13E-01	8.64E-01
Acidibacter	4.60E-06	8.48E-11	4.60E-06	6.66E-06	9.56E-12	1.17E-06	7.26E-01	8.74E-01
Ellin6067	1.33E-05	1.81E-10	6.72E-06	1.65E-05	1.06E-10	3.89E-06	7.34E-01	8.76E-01
Reyranella	4.21E-05	2.46E-11	2.48E-06	3.92E-05	2.84E-10	6.37E-06	7.35E-01	8.76E-01
Lachnospiraceae_FCS020_group	1.86E-03	3.22E-06	8.97E-04	2.24E-03	6.54E-07	3.06E-04	7.47E-01	8.85E-01
Gordonibacter	5.87E-05	9.68E-10	1.56E-05	7.28E-05	7.76E-09	3.33E-05	7.58E-01	8.94E-01
Succinivibrio	1.15E-05	9.59E-11	4.90E-06	9.47E-06	4.99E-11	2.67E-06	7.70E-01	8.97E-01
Occallatibacter	8.98E-05	8.18E-10	1.43E-05	8.15E-05	2.20E-09	1.77E-05	7.71E-01	8.97E-01
Ruminococcaceae_NK4A214_group	8.32E-04	7.61E-08	1.38E-04	9.15E-04	2.45E-07	1.87E-04	7.75E-01	8.97E-01
Devosia	7.02E-05	7.74E-10	1.39E-05	6.51E-05	1.37E-10	4.42E-06	7.81E-01	8.97E-01
Staphylococcus	2.49E-04	8.91E-08	1.49E-04	1.88E-04	6.19E-08	9.40E-05	7.85E-01	8.97E-01
Haliangium	1.62E-05	2.22E-10	7.46E-06	1.92E-05	1.37E-10	4.42E-06	7.86E-01	8.97E-01
Bradyrhizobium	1.60E-04	1.12E-09	1.68E-05	1.67E-04	1.54E-09	1.48E-05	7.96E-01	9.04E-01
Candidatus_Udaeobacter	7.29E-06	9.86E-12	1.57E-06	6.39E-06	6.26E-11	2.99E-06	8.30E-01	9.38E-01
uncultured_bacterium_f_Chitinophagaceae	8.53E-05	7.08E-10	1.33E-05	9.34E-05	6.30E-09	3.00E-05	8.42E-01	9.42E-01
Lachnospiraceae_UCG-001	1.03E-03	6.32E-07	3.98E-04	9.13E-04	4.49E-07	2.53E-04	8.43E-01	9.42E-01
Cutibacterium	7.01E-06	2.75E-11	2.62E-06	7.65E-06	8.10E-12	1.08E-06	8.55E-01	9.46E-01
uncultured_bacterium_f_67-14	1.02E-05	9.75E-12	1.56E-06	1.13E-05	1.56E-10	4.72E-06	8.58E-01	9.46E-01
Triticum_urartu	8.65E-05	2.06E-09	2.27E-05	9.20E-05	8.15E-10	1.08E-05	8.59E-01	9.46E-01
Stenotrophomonas	3.52E-05	5.40E-10	1.16E-05	3.26E-05	1.16E-10	4.06E-06	8.67E-01	9.50E-01
ASF356	1.38E-04	2.11E-08	7.26E-05	1.57E-04	4.35E-08	7.89E-05	8.85E-01	9.64E-01
uncultured_bacterium_o_Acidobacteriales	1.09E-04	3.73E-10	9.66E-06	1.13E-04	2.13E-09	1.74E-05	8.89E-01	9.64E-01
Acinetobacter	4.93E-05	2.44E-09	2.47E-05	4.53E-05	2.62E-09	1.94E-05	9.19E-01	9.86E-01
uncultured_bacterium_f_Caulobacteraceae	1.86E-05	1.89E-10	6.87E-06	1.95E-05	6.93E-11	3.15E-06	9.21E-01	9.86E-01
Methylobacterium	1.69E-04	5.32E-09	3.65E-05	1.62E-04	1.67E-08	4.88E-05	9.25E-01	9.86E-01
Rothia	7.12E-06	1.11E-10	5.28E-06	6.52E-06	1.86E-11	1.63E-06	9.28E-01	9.86E-01
Ileibacterium	4.54E-02	7.11E-03	4.22E-02	5.03E-02	3.37E-03	2.20E-02	9.32E-01	9.86E-01
Enterococcus	5.85E-05	8.76E-10	1.48E-05	6.06E-05	2.03E-09	1.70E-05	9.38E-01	9.88E-01
Bacillus	2.53E-04	2.92E-08	8.54E-05	2.47E-04	1.92E-08	5.24E-05	9.56E-01	9.98E-01
DNF00809	4.17E-05	2.15E-09	2.32E-05	4.38E-05	3.85E-09	2.35E-05	9.57E-01	9.98E-01
Enterorhabdus	2.82E-03	1.74E-06	6.60E-04	2.86E-03	3.55E-06	7.12E-04	9.68E-01	1.00E+00
Lachnospiraceae_UCG-006	7.39E-03	1.35E-04	5.82E-03	7.51E-03	1.01E-05	1.20E-03	9.83E-01	1.00E+00
uncultured_bacterium_f_Eggerthellaceae	1.89E-04	2.40E-08	7.74E-05	1.89E-04	9.45E-09	3.67E-05	9.93E-01	1.00E+00
Collinsella	1.36E-06	7.42E-12	1.36E-06	6.45E-07	2.91E-12	6.45E-07	1.00E+00	1.00E+00
Edaphobacter	2.86E-06	1.09E-11	1.65E-06	3.01E-06	3.49E-11	2.23E-06	1.00E+00	1.00E+00
Prevotellaceae_NK3B31_group	0.00E+00	0.00E+00	0.00E+00	9.24E-07	5.97E-12	9.24E-07	1.00E+00	1.00E+00
Syntrophococcus	2.72E-06	2.97E-11	2.72E-06	3.83E-06	3.15E-11	2.12E-06	1.00E+00	1.00E+00
Treponema_2	1.36E-06	7.42E-12	1.36E-06	1.11E-06	8.65E-12	1.11E-06	1.00E+00	1.00E+00
uncultured_bacterium_o_Saccharimonadales	1.36E-06	7.42E-12	1.36E-06	1.29E-06	1.16E-11	1.29E-06	1.00E+00	1.00E+00
