# Supplementary material for: Naringin Attenuates High Fat Diet Induced Non-alcoholic Fatty Liver Disease and Gut Bacterial Dysbiosis in Mice
Source: Front Microbiol. 2020 Nov 13;11:585066. doi: 10.3389/fmicb.2020.585066 (PMC7691324; doi:10.3389/fmicb.2020.585066)
Supplement: Supplementary file 8 [file Table_6.XLS]

## Sheet: genus_HFDNARce_HFDce.diffAb
genus	Mean(HFDNARce)	Variance(HFDNARce)	Std.err(HFDNARce)	Mean(HFDce)	Variance(HFDce)	Std.err(HFDce)	P value	Q value
Massilia	0.00104	6.8e-09	3.69e-05	4.87e-05	4.89e-10	8.36e-06	0	0
Clostridium_sensu_stricto_13	2.49e-05	2.51e-10	7.09e-06	0.00037	1.66e-09	1.54e-05	4.61e-06	0.000502
Occallatibacter	0.000429	3.63e-10	8.51e-06	8.15e-05	2.2e-09	1.77e-05	9.22e-06	0.00067
Bradyrhizobium	0.00253	1.07e-07	0.000146	0.000167	1.54e-09	1.48e-05	1.38e-05	0.000753
uncultured_bacterium_f_Xanthobacteraceae	0.00124	2.48e-08	7.04e-05	0.000113	1.47e-09	1.45e-05	1.84e-05	0.000804
Bryobacter	0.000524	3.78e-09	2.75e-05	7.11e-05	7.72e-10	1.05e-05	2.3e-05	0.000837
Terrisporobacter	3.31e-05	2.36e-10	6.87e-06	0.000666	1.15e-08	4.06e-05	2.76e-05	0.000861
Granulicella	0.000495	5.17e-09	3.22e-05	1.55e-05	2.24e-10	5.66e-06	3.23e-05	0.000879
Conexibacter	0.000329	1.95e-09	1.97e-05	2.64e-05	4.76e-10	8.25e-06	3.69e-05	0.000893
Lachnospiraceae_XPB1014_group	1.51e-05	6.45e-11	3.59e-06	0.00103	3.71e-08	7.28e-05	4.15e-05	0.000904
uncultured_bacterium_f_Micropepsaceae	0.000953	2.07e-08	6.43e-05	8.93e-05	6.21e-10	9.42e-06	4.61e-05	0.000913
Roseiarcus	0.000799	1.76e-08	5.94e-05	1.71e-05	2.75e-11	1.98e-06	5.07e-05	0.000921
Agathobacter	1.06e-05	2.69e-11	2.32e-06	0.000574	1.28e-08	4.27e-05	5.53e-05	0.000927
uncultured_bacterium_o_Acidobacteriales	0.00136	4.37e-08	9.35e-05	0.000113	2.13e-09	1.74e-05	5.99e-05	0.000933
Acidothermus	0.000229	1.73e-09	1.86e-05	4.11e-06	1.64e-11	1.53e-06	6.45e-05	0.000938
Phenylobacterium	0.000269	2.1e-09	2.05e-05	2.4e-05	1.05e-10	3.88e-06	6.91e-05	0.000942
Jatrophihabitans	0.000966	1.98e-08	6.29e-05	0.000157	7.23e-09	3.21e-05	7.37e-05	0.000946
uncultured_bacterium_f_p-251-o5	1.17e-06	6.9e-12	1.17e-06	0.000931	4.67e-08	8.16e-05	7.83e-05	0.000949
Faecalibacterium	1.8e-05	1.14e-10	4.78e-06	0.000199	1.76e-09	1.59e-05	8.29e-05	0.000952
Turicibacter	3.38e-05	3.05e-10	7.8e-06	0.00082	4.1e-08	7.65e-05	9.68e-05	0.00103
Rhodoplanes	0.00034	5.4e-09	3.29e-05	4.96e-06	1.42e-11	1.42e-06	0.000101	0.00103
Acidibacter	0.000482	1.09e-08	4.68e-05	6.66e-06	9.56e-12	1.17e-06	0.000106	0.00103
uncultured_bacterium_f_67-14	0.000306	4.15e-09	2.88e-05	1.13e-05	1.56e-10	4.72e-06	0.000111	0.00103
Candidatus_Udaeobacter	0.000155	1.11e-09	1.49e-05	6.39e-06	6.26e-11	2.99e-06	0.000115	0.00103
uncultured_bacterium_o_Gaiellales	0.00054	3.14e-09	2.51e-05	0.00016	6.2e-09	2.98e-05	0.00012	0.00103
Candidatus_Solibacter	0.000845	2.32e-08	6.81e-05	0.000135	5.29e-09	2.75e-05	0.000124	0.00103
Burkholderia-Caballeronia-Paraburkholderia	0.000409	2.05e-09	2.02e-05	9.75e-05	4.4e-09	2.51e-05	0.000129	0.00103
Mycobacterium	0.000194	1.25e-09	1.58e-05	3.2e-05	4.43e-10	7.96e-06	0.000134	0.00103
Edaphobacter	0.000112	7.73e-10	1.24e-05	3.01e-06	3.49e-11	2.23e-06	0.000138	0.00103
Ruminococcaceae_UCG-005	0.000156	1.51e-08	5.49e-05	0.00094	3.77e-08	7.34e-05	0.000143	0.00103
Phascolarctobacterium	4.16e-05	3.3e-10	8.13e-06	0.000231	2.99e-09	2.07e-05	0.000147	0.00103
Candidatus_Koribacter	0.000127	8.62e-10	1.31e-05	1.17e-05	7.4e-11	3.25e-06	0.000152	0.00103
Coprococcus_3	1.14e-05	4.06e-11	2.85e-06	0.000314	9.06e-09	3.6e-05	0.000157	0.00103
uncultured_bacterium_f_Acetobacteraceae	0.000509	8.82e-09	4.2e-05	9.18e-05	5.3e-09	2.75e-05	0.000161	0.00103
Reyranella	0.000234	2.57e-09	2.27e-05	3.92e-05	2.84e-10	6.37e-06	0.000166	0.00103
Family_XIII_UCG-001	0.000607	2.11e-08	6.49e-05	6.74e-05	1.31e-09	1.37e-05	0.000175	0.00106
uncultured_bacterium_f_Caulobacteraceae	0.000651	3.05e-08	7.81e-05	1.95e-05	6.93e-11	3.15e-06	0.00018	0.00106
Ellin6067	0.000102	7.23e-10	1.2e-05	1.65e-05	1.06e-10	3.89e-06	0.000221	0.00126
Corynebacterium_1	0.000146	6.59e-10	1.15e-05	3.22e-05	1.06e-09	1.23e-05	0.000226	0.00126
Devosia	0.000248	3.93e-09	2.8e-05	6.51e-05	1.37e-10	4.42e-06	0.00023	0.00126
Terrabacter	0.000154	1.52e-09	1.75e-05	4.86e-05	3.88e-10	7.44e-06	0.000415	0.00221
Acidipila	0.000635	2.63e-08	7.25e-05	0.000163	1.74e-08	4.99e-05	0.000447	0.00232
Pseudolabrys	0.000119	4.46e-10	9.45e-06	6.26e-05	1.88e-10	5.18e-06	0.000553	0.0028
Haliangium	9.59e-05	1.01e-09	1.42e-05	1.92e-05	1.37e-10	4.42e-06	0.000594	0.00295
uncultured_bacterium_c_KD4-96	0.000256	2.21e-09	2.1e-05	0.000119	2.15e-09	1.75e-05	0.000682	0.0033
Fusobacterium	2.77e-05	3.45e-10	8.31e-06	0.00112	3.4e-07	0.00022	0.000714	0.00339
Caenimonas	9.72e-05	1.86e-10	6.1e-06	4.11e-05	6.69e-10	9.78e-06	0.000774	0.00359
Ruminococcaceae_UCG-002	9.24e-05	8.85e-09	4.21e-05	0.00033	5.33e-09	2.76e-05	0.000949	0.00431
uncultured_bacterium_f_Eggerthellaceae	1.58e-05	2.38e-10	6.9e-06	0.000189	9.45e-09	3.67e-05	0.00108	0.00482
Prevotellaceae_NK3B31_group	5.12e-05	6.14e-10	1.11e-05	9.24e-07	5.97e-12	9.24e-07	0.00128	0.00557
Mitsuokella	6.69e-05	9.69e-10	1.39e-05	0.00039	3.5e-08	7.07e-05	0.00133	0.00569
Buttiauxella	4.78e-05	6.92e-11	3.72e-06	2.06e-05	1.7e-10	4.93e-06	0.00153	0.00641
uncultured_bacterium_p_WPS-2	0.000197	7.67e-09	3.92e-05	2.06e-05	6.29e-10	9.48e-06	0.0016	0.00658
Facklamia	6.84e-05	1.23e-09	1.57e-05	6.14e-06	1.03e-10	3.83e-06	0.00323	0.013
Sphingomonas	0.00268	5.38e-07	0.000328	0.00127	2.24e-07	0.000179	0.00415	0.0164
Escherichia-Shigella	0.00035	6e-08	0.00011	0.000862	4.62e-08	8.12e-05	0.00423	0.0165
Syntrophococcus	0.000117	5.32e-09	3.26e-05	3.83e-06	3.15e-11	2.12e-06	0.00759	0.029
Anaerocolumna	4.01e-05	9.03e-11	4.25e-06	1.95e-05	1.22e-10	4.18e-06	0.00787	0.0296
Corynebacterium	7.39e-06	6.39e-11	3.57e-06	2.36e-05	6.74e-11	3.1e-06	0.00819	0.0303
Megamonas	0.00021	1.5e-08	5.47e-05	2.27e-05	2.59e-10	6.09e-06	0.00848	0.0308
GCA-900066575	0.0114	2.43e-05	0.00221	0.00361	3.24e-06	0.00068	0.00865	0.0309
Faecalibaculum	0.0852	0.00292	0.0241	0.187	0.00236	0.0184	0.00905	0.0315
[Eubacterium]_nodatum_group	0.0017	2.63e-07	0.000229	0.000805	1.32e-07	0.000137	0.00912	0.0315
Allorhizobium-Neorhizobium-Pararhizobium-Rhizobium	0.000272	3.18e-09	2.52e-05	0.000162	3.32e-09	2.18e-05	0.00939	0.032
Dialister	0.000302	3.99e-08	8.93e-05	1.08e-05	3.27e-11	2.16e-06	0.0101	0.0335
Parvibacter	0.000121	9.91e-09	4.45e-05	0.000952	4.43e-07	0.000252	0.0101	0.0335
Peptococcus	0.00141	3.28e-07	0.000256	0.000436	1.93e-07	0.000166	0.0108	0.0352
Oribacterium	0.000436	8.6e-08	0.000131	2.02e-05	2.51e-10	5.99e-06	0.0112	0.0358
Candidatus_Arthromitus	0.000435	8.48e-08	0.00013	2.21e-05	1.37e-09	1.4e-05	0.0113	0.0358
Campylobacter	5.93e-06	1.98e-11	1.99e-06	0.000512	1.87e-07	0.000163	0.0121	0.0378
Coriobacteriaceae_UCG-002	0.00303	7.28e-06	0.00121	0.0299	0.000519	0.00861	0.0123	0.0378
Ruminococcaceae_UCG-013	0.000878	1.56e-07	0.000177	0.000306	2.31e-08	5.74e-05	0.0125	0.0379
Prevotellaceae_UCG-001	0.000565	1.48e-07	0.000172	5.11e-05	1.55e-10	4.71e-06	0.014	0.0418
Cetobacterium	6.05e-05	9.49e-10	1.38e-05	1.83e-05	7.78e-11	3.33e-06	0.0142	0.0419
Enterobacter	0.000393	6.41e-09	3.58e-05	0.000252	7.29e-09	3.23e-05	0.0152	0.0442
Ruminococcaceae_UCG-004	0.0018	9.93e-07	0.000446	0.000467	8.51e-08	0.00011	0.0154	0.0442
Ruminiclostridium_9	0.0247	1.57e-05	0.00177	0.0168	3.16e-05	0.00212	0.0165	0.0468
Enterorhabdus	0.000824	1.91e-07	0.000196	0.00286	3.55e-06	0.000712	0.0195	0.0544
Ruminiclostridium_6	2.57e-05	2.03e-10	6.37e-06	5.13e-05	3.35e-10	6.91e-06	0.0206	0.0564
Lysinimonas	0.000161	2.79e-09	2.36e-05	8.31e-05	1.83e-09	1.62e-05	0.0207	0.0564
CAG-873	5.44e-05	1.83e-09	1.91e-05	3.05e-06	8.52e-12	1.1e-06	0.0218	0.0585
Succinivibrio	0.000421	1.19e-07	0.000154	9.47e-06	4.99e-11	2.67e-06	0.0221	0.0585
[Eubacterium]_brachy_group	0.000386	2.66e-08	7.3e-05	0.000764	1.03e-07	0.000121	0.0223	0.0585
Lysinibacillus	0.00177	2.13e-06	0.000653	3.81e-05	8.98e-10	1.13e-05	0.0229	0.0593
Treponema_2	6.14e-05	2.7e-09	2.32e-05	1.11e-06	8.65e-12	1.11e-06	0.025	0.0638
Prevotella_7	0.000881	5.64e-07	0.000336	1.27e-05	1.85e-10	5.14e-06	0.0252	0.0638
uncultured_bacterium_f_Ruminococcaceae	0.108	0.00377	0.0275	0.0372	9.86e-05	0.00375	0.0259	0.065
uncultured_bacterium_f_Peptococcaceae	0.00759	1.5e-05	0.00173	0.00314	5.27e-07	0.000274	0.0274	0.068
Ruminococcaceae_UCG-014	0.00924	1.22e-05	0.00157	0.00479	4.77e-06	0.000826	0.0286	0.07
Acinetobacter	0.000336	6.6e-08	0.000115	4.53e-05	2.62e-09	1.94e-05	0.0297	0.0719
Paenibacillus	0.000276	6.36e-08	0.000113	1.11e-06	8.65e-12	1.11e-06	0.0321	0.077
Rikenella	0.0093	5.54e-05	0.00333	0.00107	6.08e-06	0.000932	0.035	0.0822
Anaerotruncus	0.0109	4.8e-05	0.0031	0.00326	6.07e-06	0.000931	0.0355	0.0822
Harryflintia	0.00425	9.1e-06	0.00135	0.001	5.46e-07	0.000279	0.0362	0.0822
Intestinimonas	0.0424	0.000408	0.00903	0.0202	5.49e-05	0.0028	0.0366	0.0822
Ruminiclostridium_5	0.0172	4.86e-05	0.00312	0.0087	2.42e-05	0.00186	0.0366	0.0822
Ruminococcaceae_UCG-009	0.0068	1.54e-05	0.00175	0.00247	2.3e-06	0.000573	0.0368	0.0822
[Eubacterium]_coprostanoligenes_group	0.000528	2.58e-08	7.18e-05	0.00137	8.6e-07	0.00035	0.037	0.0822
Alcaligenes	3.61e-05	1.9e-10	6.17e-06	2.12e-05	2.01e-11	1.7e-06	0.0382	0.0842
Ruminococcaceae_UCG-010	0.000406	3.19e-08	7.98e-05	0.000195	1.68e-08	4.9e-05	0.0417	0.0909
A2	0.000724	4.53e-07	0.000301	0.00662	5.07e-05	0.00269	0.047	0.101
Bacteroides	0.0195	0.00032	0.008	0.00208	1.28e-06	0.000427	0.0472	0.101
Candidatus_Saccharimonas	0.00807	1.17e-05	0.00153	0.00428	5.22e-06	0.000864	0.0486	0.103
uncultured_bacterium_f_Christensenellaceae	0.00139	9.71e-07	0.000441	0.00043	4.22e-08	7.76e-05	0.0495	0.104
Rikenellaceae_RC9_gut_group	2.51e-05	3.53e-10	8.4e-06	0.00101	1.53e-06	0.000468	0.0524	0.109
Novosphingobium	7.53e-05	7.85e-10	1.25e-05	4.54e-05	3.25e-10	6.82e-06	0.0532	0.109
uncultured_bacterium_o_Saccharimonadales	4.59e-05	2.27e-09	2.13e-05	1.29e-06	1.16e-11	1.29e-06	0.0538	0.11
Collinsella	6.41e-06	3.65e-11	2.7e-06	6.45e-07	2.91e-12	6.45e-07	0.0551	0.111
Leucobacter	5.98e-05	7.48e-10	1.22e-05	3.19e-05	2.47e-10	5.94e-06	0.0568	0.114
Ileibacterium	0.00463	7e-05	0.00374	0.0503	0.00337	0.022	0.0574	0.114
Prevotella_9	0.00178	2.89e-06	0.000761	0.00023	4.05e-09	2.41e-05	0.0584	0.115
Dubosiella	0.0117	0.000123	0.00496	0.0264	0.000214	0.00553	0.0633	0.123
Gordonibacter	9.17e-06	7.62e-11	3.9e-06	7.28e-05	7.76e-09	3.33e-05	0.0726	0.14
Bacillus	0.000454	4.67e-08	9.66e-05	0.000247	1.92e-08	5.24e-05	0.075	0.143
DNF00809	0	0	0	4.38e-05	3.85e-09	2.35e-05	0.0771	0.146
uncultured_bacterium_f_Clostridiales_vadinBB60_group	0.00661	5.26e-05	0.00324	0.000594	2.25e-07	0.000179	0.0796	0.15
[Eubacterium]_eligens_group	0.000145	1.7e-08	5.82e-05	3.75e-05	2.95e-10	6.49e-06	0.0825	0.154
Anaerovorax	0.000612	4.18e-07	0.000289	8.88e-05	2.44e-09	1.87e-05	0.0866	0.16
Mucispirillum	0.00442	1.59e-05	0.00178	0.00107	2.44e-06	0.000591	0.0916	0.168
uncultured_bacterium	0.000487	2.95e-08	7.67e-05	0.00035	2.13e-09	1.74e-05	0.0987	0.179
Lachnospiraceae_UCG-006	0.00502	3.13e-06	0.000792	0.00751	1.01e-05	0.0012	0.101	0.182
Parasutterella	0.00484	2.65e-05	0.0023	0.000861	2.97e-07	0.000206	0.102	0.182
Streptomyces	0.000106	1.93e-09	1.96e-05	7.05e-05	3.54e-10	7.11e-06	0.103	0.183
Pseudogracilibacillus	2.08e-05	2.28e-11	2.14e-06	1.01e-05	2.58e-10	6.07e-06	0.114	0.201
uncultured_bacterium_f_Lachnospiraceae	0.0898	0.000638	0.0113	0.0664	0.000515	0.00858	0.118	0.206
Alistipes	0.0505	0.00252	0.0224	0.0126	0.000333	0.0069	0.125	0.217
uncultured_bacterium_f_ML635J-40_aquatic_group	0.000261	1.01e-07	0.000142	3.29e-05	8.17e-10	1.08e-05	0.127	0.218
Dorea	3.31e-05	1.69e-11	1.84e-06	0.000132	2.69e-08	6.2e-05	0.13	0.22
Mesorhizobium	9.65e-05	8.64e-10	1.31e-05	7.12e-05	5.53e-10	8.89e-06	0.13	0.22
Tyzzerella	0.00283	9.36e-06	0.00137	0.000638	4.76e-07	0.000261	0.135	0.227
Parabacteroides	0.00692	8.04e-05	0.00401	0.000634	1.59e-07	0.000151	0.138	0.229
uncultured_bacterium_f_Desulfovibrionaceae	0.00276	2.89e-06	0.00076	0.0508	0.00694	0.0315	0.151	0.249
Oscillibacter	0.0348	0.000216	0.00658	0.0234	8.82e-05	0.00355	0.153	0.25
uncultured_bacterium_o_Rhodospirillales	0.00228	1.03e-05	0.00144	0.000104	1.16e-08	4.07e-05	0.156	0.254
Sphingobacterium	6.04e-05	4.45e-10	9.43e-06	4.1e-05	5.42e-10	8.8e-06	0.157	0.254
Cutibacterium	2.22e-05	4.72e-10	9.72e-06	7.65e-06	8.1e-12	1.08e-06	0.163	0.262
Paraprevotella	0.000467	5.12e-07	0.00032	5.17e-06	5.66e-11	2.84e-06	0.177	0.28
Brevundimonas	6.41e-05	9.16e-10	1.35e-05	4.25e-05	2.91e-10	6.45e-06	0.179	0.28
Libanicoccus	1.24e-05	1.42e-10	5.32e-06	3.33e-06	7.78e-11	3.33e-06	0.179	0.28
Akkermansia	0.00604	8.49e-05	0.00412	0.0455	0.0054	0.0278	0.191	0.296
Lachnospiraceae_NK4A136_group	0.028	0.000155	0.00557	0.0195	3.73e-05	0.00231	0.192	0.296
Ruminiclostridium	0.0153	8.67e-05	0.00417	0.00886	2.47e-05	0.00188	0.193	0.296
uncultured_bacterium_o_IMCC26256	0.000151	9.03e-09	4.25e-05	8.26e-05	5.83e-09	2.89e-05	0.219	0.333
Odoribacter	0.0115	6.7e-05	0.00366	0.00522	6.55e-05	0.00306	0.228	0.345
Globicatella	4.02e-05	3.27e-09	2.56e-05	6.66e-06	5.27e-11	2.74e-06	0.232	0.349
Butyricicoccus	0.000944	4.7e-07	0.000307	0.000496	1.94e-07	0.000166	0.239	0.355
uncultured_bacterium_o_Gastranaerophilales	0.00818	0.000151	0.00549	0.0011	1.9e-06	0.000521	0.239	0.355
Bifidobacterium	0.00198	1.55e-06	0.000556	0.00557	5.8e-05	0.00288	0.264	0.389
[Ruminococcus]_torques_group	8.35e-06	4.89e-11	3.13e-06	1.59e-05	2.2e-10	5.61e-06	0.286	0.419
Nicotiana_otophora	0.00279	2.23e-07	0.000211	0.00252	8.06e-08	0.000107	0.301	0.438
Family_XIII_AD3011_group	0.00153	1.91e-06	0.000619	0.000827	7.71e-08	0.000105	0.316	0.452
Megasphaera	0.00133	7.68e-07	0.000392	0.000894	1.22e-08	4.17e-05	0.317	0.452
Lachnospiraceae_UCG-001	0.00132	3.67e-07	0.000271	0.000913	4.49e-07	0.000253	0.319	0.452
Pseudomonas	0.000451	4.67e-09	3.06e-05	0.000396	1.08e-08	3.93e-05	0.32	0.452
Defluviitaleaceae_UCG-011	3.63e-05	5.05e-09	3.18e-05	2e-06	6.44e-12	9.59e-07	0.333	0.469
Blautia	0.00673	1.65e-05	0.00182	0.0155	0.000462	0.00812	0.345	0.482
Brachyspira	3.73e-06	6.95e-11	3.73e-06	0.000516	1.66e-06	0.000487	0.347	0.482
Erysipelatoclostridium	3.75e-05	1.86e-09	1.93e-05	0.000232	2.61e-07	0.000193	0.375	0.516
Enteractinococcus	4.53e-05	1.89e-10	6.15e-06	2.88e-05	1.64e-09	1.53e-05	0.376	0.516
Streptococcus	0.00124	4.17e-07	0.000289	0.000947	4.03e-08	7.59e-05	0.381	0.519
Helicobacter	0.0039	2.12e-05	0.00206	0.0115	0.000384	0.00741	0.384	0.519
Ruminococcus_1	1.62e-05	1.42e-10	5.33e-06	2.91e-05	9.92e-10	1.19e-05	0.385	0.519
Alloprevotella	0.000704	1.93e-07	0.000197	0.00091	5.06e-08	8.5e-05	0.402	0.535
[Eubacterium]_fissicatena_group	1.83e-05	3.44e-10	8.3e-06	0.000163	1.58e-07	0.00015	0.403	0.535
Ruminococcus_2	0.000102	5.67e-09	3.37e-05	6.86e-05	9.69e-10	1.18e-05	0.417	0.548
Enterococcus	8.11e-05	9.57e-10	1.38e-05	6.06e-05	2.03e-09	1.7e-05	0.419	0.548
Rhodanobacter	0.000156	2.22e-09	2.11e-05	0.000199	1.18e-08	4.1e-05	0.42	0.548
Clostridium_sensu_stricto_1	0.00202	2.58e-06	0.000719	0.00462	5.18e-05	0.00272	0.423	0.55
Arthrobacter	0.000261	2.63e-08	7.25e-05	0.00019	8.04e-09	3.39e-05	0.439	0.567
uncultured_bacterium_f_Erysipelotrichaceae	0.00355	5.18e-05	0.00322	0.00108	7.15e-08	0.000101	0.511	0.656
uncultured_bacterium_o_Mollicutes_RF39	0.00024	1.71e-07	0.000185	9.89e-05	2.75e-09	1.98e-05	0.514	0.656
Lachnospiraceae_FCS020_group	0.0019	5.32e-07	0.000326	0.00224	6.54e-07	0.000306	0.521	0.661
agricultural_soil_bacterium_SC-I-84	9.66e-05	1.44e-09	1.69e-05	8.16e-05	1.01e-09	1.2e-05	0.535	0.674
Marvinbryantia	0.000122	1.46e-09	1.71e-05	0.000148	7.15e-09	3.2e-05	0.544	0.68
Lachnospiraceae_UCG-008	0.00157	5.28e-06	0.00103	0.00455	0.000118	0.00411	0.546	0.68
Desulfovibrio	0.0316	0.000643	0.0113	0.0414	0.0005	0.00845	0.553	0.683
Triticum_urartu	7.81e-05	1.44e-09	1.7e-05	9.2e-05	8.15e-10	1.08e-05	0.555	0.683
Ochrobactrum	0.000162	1.05e-08	4.58e-05	0.000127	5.21e-09	2.73e-05	0.571	0.695
Microbacterium	0.00013	8.49e-10	1.3e-05	0.000116	1.65e-09	1.54e-05	0.572	0.695
Hymenobacter	0.000129	6.62e-09	3.64e-05	9.75e-05	6.94e-09	3.15e-05	0.575	0.695
Bilophila	0.016	8.14e-05	0.00404	0.0208	0.000278	0.0063	0.577	0.695
Roseburia	0.0433	0.000479	0.00979	0.0353	0.000544	0.00882	0.599	0.717
ASF356	0.000248	8.98e-08	0.000134	0.000157	4.35e-08	7.89e-05	0.611	0.728
[Eubacterium]_xylanophilum_group	0.000909	6.97e-07	0.000373	0.000683	1.3e-07	0.000136	0.621	0.734
Ruminococcaceae_NK4A214_group	0.00116	7.99e-07	0.0004	0.000915	2.45e-07	0.000187	0.623	0.734
Sporosarcina	4.5e-05	3.7e-10	8.6e-06	3.29e-05	2.76e-09	1.98e-05	0.627	0.735
Lachnoclostridium	0.0318	0.000173	0.00589	0.028	0.000172	0.00496	0.659	0.768
Nitrospira	9.82e-05	7.12e-09	3.77e-05	7.72e-05	4.69e-09	2.59e-05	0.684	0.793
Negativibacillus	0.000597	1.06e-07	0.000146	0.000736	5.09e-07	0.00027	0.688	0.793
Atopostipes	3.73e-06	1.17e-11	1.53e-06	2.38e-06	3.95e-11	2.38e-06	0.696	0.794
Staphylococcus	0.000272	1.41e-07	0.000168	0.000188	6.19e-08	9.4e-05	0.699	0.794
uncultured_bacterium_f_Burkholderiaceae	0.000117	4.61e-09	3.04e-05	9.96e-05	5.31e-09	2.76e-05	0.7	0.794
Christensenellaceae_R-7_group	0.000661	3.02e-07	0.000246	0.000553	2.6e-08	6.09e-05	0.703	0.794
Gemella	0.000559	1.9e-07	0.000195	0.000658	1.19e-07	0.00013	0.709	0.797
Methylobacterium	0.000199	2.86e-08	7.56e-05	0.000162	1.67e-08	4.88e-05	0.714	0.798
Jeotgalicoccus	3.21e-05	8.17e-11	4.04e-06	2.77e-05	7.45e-10	1.03e-05	0.725	0.798
Sellimonas	4.28e-06	1.71e-11	1.85e-06	3.11e-06	9.9e-12	1.19e-06	0.725	0.798
uncultured_bacterium_o_KF-JG30-C25	0.000476	1.45e-07	0.00017	0.00039	1.26e-07	0.000134	0.725	0.798
Acidiphilium	0.000174	2.62e-08	7.24e-05	0.000141	1.42e-08	4.5e-05	0.736	0.807
Lactococcus	0.000584	2.31e-07	0.000215	0.00049	1.67e-07	0.000154	0.749	0.816
Rothia	8.25e-06	1.09e-10	4.67e-06	6.52e-06	1.86e-11	1.63e-06	0.754	0.817
Prevotella_1	0.000138	1.05e-08	4.59e-05	0.00012	4.01e-09	2.39e-05	0.761	0.822
Muribaculum	0.00146	1.24e-06	0.000499	0.00127	7.11e-07	0.000319	0.77	0.824
Subdoligranulum	0.00036	1.55e-07	0.000176	0.000417	3.56e-09	2.25e-05	0.771	0.824
Barnesiella	4.87e-06	7.28e-11	3.81e-06	6.2e-06	2.54e-11	1.9e-06	0.778	0.825
Lactobacillus	0.00765	8.05e-05	0.00401	0.00912	4.55e-05	0.00255	0.78	0.825
Stenotrophomonas	3.54e-05	4.43e-10	9.41e-06	3.26e-05	1.16e-10	4.06e-06	0.806	0.849
Romboutsia	0.0134	0.000154	0.00554	0.0116	0.000122	0.00417	0.818	0.857
uncultured_bacterium_f_Chitinophagaceae	0.000102	4.12e-09	2.87e-05	9.34e-05	6.3e-09	3e-05	0.842	0.879
uncultured_bacterium_f_Muribaculaceae	0.0932	0.00308	0.0248	0.0995	0.002	0.0169	0.847	0.879
Leuconostoc	7.3e-05	3.34e-09	2.59e-05	6.71e-05	3.97e-09	2.38e-05	0.876	0.905
Allobaculum	0.00876	8.99e-05	0.00424	0.00934	8.45e-06	0.0011	0.9	0.923
Lachnospira	4.1e-05	1.9e-09	1.95e-05	4.38e-05	6.69e-10	9.78e-06	0.903	0.923
Serratia	0.000708	4.14e-07	0.000288	0.000662	4.21e-07	0.000245	0.907	0.923
Chujaibacter	0.000855	2.76e-07	0.000235	0.000819	3.03e-07	0.000208	0.912	0.925
uncultured_bacterium_o_Subgroup_2	6.15e-05	1.87e-09	1.93e-05	5.95e-05	1.43e-09	1.43e-05	0.934	0.943
UBA1819	0.0015	2.65e-06	0.000728	0.00156	2.24e-06	0.000566	0.946	0.95
Ruminococcaceae_UCG-003	0.000547	2.07e-07	0.000203	0.000551	6.04e-07	0.000294	0.987	0.987
